# Supplementary material
Source: publisher figshare collection journal article supplement (https://acs.figshare.com/ndownloader/files/4481263)
Supplement: Supplementary file 1 [file 4481263]

  
data_r81210d1 
  
_audit_creation_method            SHELXL-97 
_chemical_name_systematic 
; 
 ? 
; 
_chemical_name_common             ? 
_chemical_melting_point           ? 
_chemical_formula_moiety          ? 
_chemical_formula_sum 
 'C20 H20 O4' 
_chemical_formula_weight          324.36 
  
loop_ 
 _atom_type_symbol 
 _atom_type_description 
 _atom_type_scat_dispersion_real 
 _atom_type_scat_dispersion_imag 
 _atom_type_scat_source 
 'C'  'C'   0.0033   0.0016 
 'International Tables Vol C Tables 4.2.6.8 and 6.1.1.4' 
 'H'  'H'   0.0000   0.0000 
 'International Tables Vol C Tables 4.2.6.8 and 6.1.1.4' 
 'O'  'O'   0.0106   0.0060 
 'International Tables Vol C Tables 4.2.6.8 and 6.1.1.4' 
  
_symmetry_cell_setting            Monoclinic 
_symmetry_space_group_name_H-M    P2(1)/c 
  
loop_ 
 _symmetry_equiv_pos_as_xyz 
 'x, y, z' 
 '-x, y+1/2, -z+1/2' 
 '-x, -y, -z' 
 'x, -y-1/2, z-1/2' 
  
_cell_length_a                    15.257(3) 
_cell_length_b                    7.3998(15) 
_cell_length_c                    15.245(3) 
_cell_angle_alpha                 90.00 
_cell_angle_beta                  91.42(3) 
_cell_angle_gamma                 90.00 
_cell_volume                      1720.7(6) 
_cell_formula_units_Z             4 
_cell_measurement_temperature     113(2) 
_cell_measurement_reflns_used     3590 
_cell_measurement_theta_min       2.671 
_cell_measurement_theta_max       27.928 
  
_exptl_crystal_description        ? 
_exptl_crystal_colour             ? 
_exptl_crystal_size_max           0.20 
_exptl_crystal_size_mid           0.18 
_exptl_crystal_size_min           0.10 
_exptl_crystal_density_meas       ? 
_exptl_crystal_density_diffrn     1.252 
_exptl_crystal_density_method     'not measured' 
_exptl_crystal_F_000              688 
_exptl_absorpt_coefficient_mu     0.087 
_exptl_absorpt_correction_type    MULTI-SCAN 
_exptl_absorpt_correction_T_min   0.9829 
_exptl_absorpt_correction_T_max   0.9914 
_exptl_absorpt_process_details    crystalclear 
  
_exptl_special_details 
; 
 ? 
; 
  
_diffrn_ambient_temperature       113(2) 
_diffrn_radiation_wavelength      0.71073 
_diffrn_radiation_type            MoK\a 
_diffrn_radiation_source          'rotating anode' 
_diffrn_radiation_monochromator   confocal 
_diffrn_measurement_device_type   'rigaku saturn' 
_diffrn_measurement_method        '\w scans' 
_diffrn_detector_area_resol_mean  ? 
_diffrn_standards_number          0 
_diffrn_standards_interval_count  0 
_diffrn_standards_interval_time   0 
_diffrn_standards_decay_%         0 
_diffrn_reflns_number             12327 
_diffrn_reflns_av_R_equivalents   0.1603 
_diffrn_reflns_av_sigmaI/netI     0.1622 
_diffrn_reflns_limit_h_min        -18 
_diffrn_reflns_limit_h_max        18 
_diffrn_reflns_limit_k_min        -8 
_diffrn_reflns_limit_k_max        8 
_diffrn_reflns_limit_l_min        -12 
_diffrn_reflns_limit_l_max        18 
_diffrn_reflns_theta_min          2.67 
_diffrn_reflns_theta_max          25.02 
_reflns_number_total              3024 
_reflns_number_gt                 1750 
_reflns_threshold_expression      >2sigma(I) 
  
_computing_data_collection        'crystalclear' 
_computing_cell_refinement        'crystalclear' 
_computing_data_reduction         'crystalclear' 
_computing_structure_solution     'SHELXS-97 (Sheldrick, 1990)' 
_computing_structure_refinement   'SHELXL-97 (Sheldrick, 1997)' 
_computing_molecular_graphics     'Bruker SHELXTL' 
_computing_publication_material   'Bruker SHELXTL' 
  
_refine_special_details 
; 
 Refinement of F^2^ against ALL reflections.  The weighted R-factor wR and 
 goodness of fit S are based on F^2^, conventional R-factors R are based 
 on F, with F set to zero for negative F^2^. The threshold expression of 
 F^2^ > 2sigma(F^2^) is used only for calculating R-factors(gt) etc. and is 
 not relevant to the choice of reflections for refinement.  R-factors based 
 on F^2^ are statistically about twice as large as those based on F, and R- 
 factors based on ALL data will be even larger. 
; 
  
_refine_ls_structure_factor_coef  Fsqd 
_refine_ls_matrix_type            full 
_refine_ls_weighting_scheme       calc 
_refine_ls_weighting_details 
 'calc w=1/[\s^2^(Fo^2^)+(0.0187P)^2^+0.0000P] where P=(Fo^2^+2Fc^2^)/3' 
_atom_sites_solution_primary      direct 
_atom_sites_solution_secondary    difmap 
_atom_sites_solution_hydrogens    geom 
_refine_ls_hydrogen_treatment     CONSTR 
_refine_ls_extinction_method      none 
_refine_ls_extinction_coef        ? 
_refine_ls_number_reflns          3024 
_refine_ls_number_parameters      220 
_refine_ls_number_restraints      0 
_refine_ls_R_factor_all           0.0789 
_refine_ls_R_factor_gt            0.0500 
_refine_ls_wR_factor_ref          0.0909 
_refine_ls_wR_factor_gt           0.0855 
_refine_ls_goodness_of_fit_ref    0.885 
_refine_ls_restrained_S_all       0.885 
_refine_ls_shift/su_max           0.001 
_refine_ls_shift/su_mean          0.000 
  
loop_ 
 _atom_site_label 
 _atom_site_type_symbol 
 _atom_site_fract_x 
 _atom_site_fract_y 
 _atom_site_fract_z 
 _atom_site_U_iso_or_equiv 
 _atom_site_adp_type 
 _atom_site_occupancy 
 _atom_site_symmetry_multiplicity 
 _atom_site_calc_flag 
 _atom_site_refinement_flags 
 _atom_site_disorder_assembly 
 _atom_site_disorder_group 
O1 O 0.18881(9) 0.05599(16) 1.03615(9) 0.0209(4) Uani 1 1 d . . . 
O2 O 0.09979(9) 0.11999(18) 0.92040(9) 0.0267(4) Uani 1 1 d . . . 
O3 O 0.01959(9) -0.16686(19) 0.67401(9) 0.0297(4) Uani 1 1 d . . . 
H3 H -0.0184 -0.2203 0.6452 0.045 Uiso 1 1 calc R . . 
O4 O 0.30477(9) 0.00032(17) 0.47251(10) 0.0272(4) Uani 1 1 d . . . 
C1 C 0.44370(14) -0.0479(3) 0.83518(14) 0.0262(5) Uani 1 1 d . . . 
H1 H 0.4025 -0.1282 0.8117 0.031 Uiso 1 1 calc R . . 
C2 C 0.52922(14) -0.0509(3) 0.80578(15) 0.0337(6) Uani 1 1 d . . . 
H2 H 0.5451 -0.1345 0.7635 0.040 Uiso 1 1 calc R . . 
C3 C 0.59086(14) 0.0698(3) 0.83904(14) 0.0344(6) Uani 1 1 d . . . 
H3A H 0.6477 0.0689 0.8183 0.041 Uiso 1 1 calc R . . 
C4 C 0.56751(14) 0.1926(3) 0.90368(14) 0.0334(6) Uani 1 1 d . . . 
H4 H 0.6086 0.2737 0.9265 0.040 Uiso 1 1 calc R . . 
C5 C 0.48210(14) 0.1927(3) 0.93377(13) 0.0259(5) Uani 1 1 d . . . 
H5 H 0.4669 0.2734 0.9776 0.031 Uiso 1 1 calc R . . 
C6 C 0.41922(13) 0.0750(2) 0.89977(13) 0.0204(5) Uani 1 1 d . . . 
C7 C 0.33105(13) 0.0805(3) 0.93678(13) 0.0218(5) Uani 1 1 d . . . 
H7 H 0.3294 0.1056 0.9965 0.026 Uiso 1 1 calc R . . 
C8 C 0.25232(13) 0.0545(3) 0.89657(13) 0.0184(5) Uani 1 1 d . . . 
C9 C 0.17214(13) 0.0793(3) 0.95007(14) 0.0191(5) Uani 1 1 d . . . 
C10 C 0.11617(13) 0.0958(3) 1.09365(13) 0.0226(5) Uani 1 1 d . . . 
H10A H 0.0664 0.0187 1.0796 0.027 Uiso 1 1 calc R . . 
H10B H 0.0981 0.2209 1.0873 0.027 Uiso 1 1 calc R . . 
C11 C 0.15024(14) 0.0597(3) 1.18621(13) 0.0266(5) Uani 1 1 d . . . 
H11A H 0.1686 -0.0640 1.1911 0.040 Uiso 1 1 calc R . . 
H11B H 0.1046 0.0827 1.2269 0.040 Uiso 1 1 calc R . . 
H11C H 0.1991 0.1377 1.1992 0.040 Uiso 1 1 calc R . . 
C12 C 0.24073(13) 0.0264(2) 0.80181(13) 0.0193(5) Uani 1 1 d . . . 
H12 H 0.2889 0.0552 0.7684 0.023 Uiso 1 1 calc R . . 
C13 C 0.17083(13) -0.0347(2) 0.75689(13) 0.0197(5) Uani 1 1 d . . . 
H13 H 0.1218 -0.0657 0.7887 0.024 Uiso 1 1 calc R . . 
C14 C 0.16491(14) -0.0569(2) 0.66134(14) 0.0194(5) Uani 1 1 d . . . 
C15 C 0.08821(13) -0.1231(3) 0.62054(14) 0.0232(5) Uani 1 1 d . . . 
C16 C 0.08155(14) -0.1453(2) 0.53011(13) 0.0237(5) Uani 1 1 d . . . 
H16 H 0.0296 -0.1879 0.5046 0.028 Uiso 1 1 calc R . . 
C17 C 0.15203(14) -0.1043(2) 0.47753(13) 0.0224(5) Uani 1 1 d . . . 
H17 H 0.1475 -0.1187 0.4170 0.027 Uiso 1 1 calc R . . 
C18 C 0.22933(13) -0.0414(3) 0.51674(14) 0.0201(5) Uani 1 1 d . . . 
C19 C 0.23536(13) -0.0157(2) 0.60668(13) 0.0184(5) Uani 1 1 d . . . 
H19 H 0.2871 0.0298 0.6316 0.022 Uiso 1 1 calc R . . 
C20 C 0.30118(16) -0.0268(3) 0.37944(15) 0.0352(7) Uani 1 1 d . . . 
H20A H 0.2878 -0.1511 0.3670 0.053 Uiso 1 1 calc R . . 
H20B H 0.3569 0.0034 0.3554 0.053 Uiso 1 1 calc R . . 
H20C H 0.2565 0.0490 0.3536 0.053 Uiso 1 1 calc R . . 
  
loop_ 
 _atom_site_aniso_label 
 _atom_site_aniso_U_11 
 _atom_site_aniso_U_22 
 _atom_site_aniso_U_33 
 _atom_site_aniso_U_23 
 _atom_site_aniso_U_13 
 _atom_site_aniso_U_12 
O1 0.0195(8) 0.0240(7) 0.0193(8) -0.0007(7) 0.0009(6) 0.0029(7) 
O2 0.0215(8) 0.0321(8) 0.0263(8) -0.0011(7) -0.0007(7) 0.0059(8) 
O3 0.0182(7) 0.0424(9) 0.0286(8) -0.0119(8) 0.0017(6) -0.0104(8) 
O4 0.0309(9) 0.0326(8) 0.0184(8) 0.0005(7) 0.0034(7) -0.0048(8) 
C1 0.0203(11) 0.0329(11) 0.0256(13) -0.0018(11) 0.0016(9) -0.0033(12) 
C2 0.0256(13) 0.0442(12) 0.0315(15) 0.0029(12) 0.0062(11) 0.0029(13) 
C3 0.0208(11) 0.0537(14) 0.0291(14) 0.0117(13) 0.0062(10) -0.0013(13) 
C4 0.0230(11) 0.0443(13) 0.0325(13) 0.0078(12) -0.0045(10) -0.0110(13) 
C5 0.0284(12) 0.0270(11) 0.0221(12) 0.0044(11) -0.0031(9) -0.0013(12) 
C6 0.0192(11) 0.0238(10) 0.0181(11) 0.0048(10) -0.0036(8) -0.0030(11) 
C7 0.0231(12) 0.0210(11) 0.0214(12) 0.0036(10) 0.0003(9) -0.0012(11) 
C8 0.0206(11) 0.0148(10) 0.0199(12) 0.0001(10) -0.0011(9) -0.0022(11) 
C9 0.0199(11) 0.0143(10) 0.0231(12) -0.0015(10) -0.0037(9) 0.0008(11) 
C10 0.0194(11) 0.0221(10) 0.0264(13) -0.0041(10) 0.0044(9) 0.0017(10) 
C11 0.0295(12) 0.0290(11) 0.0214(13) -0.0028(11) 0.0026(10) -0.0018(12) 
C12 0.0201(11) 0.0199(10) 0.0178(11) 0.0020(10) -0.0012(9) -0.0025(11) 
C13 0.0226(11) 0.0172(10) 0.0192(12) 0.0001(10) 0.0017(9) -0.0001(11) 
C14 0.0207(11) 0.0156(10) 0.0218(12) 0.0003(10) -0.0020(9) 0.0033(11) 
C15 0.0231(11) 0.0221(11) 0.0246(12) -0.0033(10) 0.0036(10) 0.0029(10) 
C16 0.0215(11) 0.0223(11) 0.0270(12) -0.0034(11) -0.0065(9) 0.0023(11) 
C17 0.0297(12) 0.0200(11) 0.0173(11) -0.0016(10) -0.0038(9) 0.0000(11) 
C18 0.0228(11) 0.0160(10) 0.0217(12) 0.0024(9) 0.0021(9) 0.0026(10) 
C19 0.0157(11) 0.0180(10) 0.0212(12) 0.0001(10) -0.0069(9) -0.0002(10) 
C20 0.0488(16) 0.0328(12) 0.0243(13) -0.0080(11) 0.0082(12) -0.0123(12) 
  
_geom_special_details 
; 
 All esds (except the esd in the dihedral angle between two l.s. planes) 
 are estimated using the full covariance matrix.  The cell esds are taken 
 into account individually in the estimation of esds in distances, angles 
 and torsion angles; correlations between esds in cell parameters are only 
 used when they are defined by crystal symmetry.  An approximate (isotropic) 
 treatment of cell esds is used for estimating esds involving l.s. planes. 
; 
  
loop_ 
 _geom_bond_atom_site_label_1 
 _geom_bond_atom_site_label_2 
 _geom_bond_distance 
 _geom_bond_site_symmetry_2 
 _geom_bond_publ_flag 
O1 C9 1.342(2) . ? 
O1 C10 1.4601(18) . ? 
O2 C9 1.220(3) . ? 
O3 C15 1.381(2) . ? 
O3 H3 0.8200 . ? 
O4 C18 1.383(2) . ? 
O4 C20 1.433(3) . ? 
C1 C2 1.390(3) . ? 
C1 C6 1.398(3) . ? 
C1 H1 0.9300 . ? 
C2 C3 1.384(3) . ? 
C2 H2 0.9300 . ? 
C3 C4 1.393(3) . ? 
C3 H3A 0.9300 . ? 
C4 C5 1.392(3) . ? 
C4 H4 0.9300 . ? 
C5 C6 1.387(3) . ? 
C5 H5 0.9300 . ? 
C6 C7 1.472(2) . ? 
C7 C8 1.349(3) . ? 
C7 H7 0.9300 . ? 
C8 C12 1.466(3) . ? 
C8 C9 1.498(2) . ? 
C10 C11 1.515(3) . ? 
C10 H10A 0.9700 . ? 
C10 H10B 0.9700 . ? 
C11 H11A 0.9600 . ? 
C11 H11B 0.9600 . ? 
C11 H11C 0.9600 . ? 
C12 C13 1.332(3) . ? 
C12 H12 0.9300 . ? 
C13 C14 1.467(3) . ? 
C13 H13 0.9300 . ? 
C14 C15 1.400(3) . ? 
C14 C19 1.410(2) . ? 
C15 C16 1.390(3) . ? 
C16 C17 1.391(2) . ? 
C16 H16 0.9300 . ? 
C17 C18 1.389(3) . ? 
C17 H17 0.9300 . ? 
C18 C19 1.385(3) . ? 
C19 H19 0.9300 . ? 
C20 H20A 0.9600 . ? 
C20 H20B 0.9600 . ? 
C20 H20C 0.9600 . ? 
  
loop_ 
 _geom_angle_atom_site_label_1 
 _geom_angle_atom_site_label_2 
 _geom_angle_atom_site_label_3 
 _geom_angle 
 _geom_angle_site_symmetry_1 
 _geom_angle_site_symmetry_3 
 _geom_angle_publ_flag 
C9 O1 C10 115.65(16) . . ? 
C15 O3 H3 109.5 . . ? 
C18 O4 C20 116.08(18) . . ? 
C2 C1 C6 120.4(2) . . ? 
C2 C1 H1 119.8 . . ? 
C6 C1 H1 119.8 . . ? 
C3 C2 C1 120.4(2) . . ? 
C3 C2 H2 119.8 . . ? 
C1 C2 H2 119.8 . . ? 
C2 C3 C4 119.77(18) . . ? 
C2 C3 H3A 120.1 . . ? 
C4 C3 H3A 120.1 . . ? 
C5 C4 C3 119.4(2) . . ? 
C5 C4 H4 120.3 . . ? 
C3 C4 H4 120.3 . . ? 
C6 C5 C4 121.40(19) . . ? 
C6 C5 H5 119.3 . . ? 
C4 C5 H5 119.3 . . ? 
C5 C6 C1 118.52(17) . . ? 
C5 C6 C7 118.01(17) . . ? 
C1 C6 C7 123.40(19) . . ? 
C8 C7 C6 129.34(19) . . ? 
C8 C7 H7 115.3 . . ? 
C6 C7 H7 115.3 . . ? 
C7 C8 C12 123.53(17) . . ? 
C7 C8 C9 117.71(18) . . ? 
C12 C8 C9 118.27(19) . . ? 
O2 C9 O1 122.83(16) . . ? 
O2 C9 C8 124.87(19) . . ? 
O1 C9 C8 112.28(18) . . ? 
O1 C10 C11 105.99(16) . . ? 
O1 C10 H10A 110.5 . . ? 
C11 C10 H10A 110.5 . . ? 
O1 C10 H10B 110.5 . . ? 
C11 C10 H10B 110.5 . . ? 
H10A C10 H10B 108.7 . . ? 
C10 C11 H11A 109.5 . . ? 
C10 C11 H11B 109.5 . . ? 
H11A C11 H11B 109.5 . . ? 
C10 C11 H11C 109.5 . . ? 
H11A C11 H11C 109.5 . . ? 
H11B C11 H11C 109.5 . . ? 
C13 C12 C8 129.07(17) . . ? 
C13 C12 H12 115.5 . . ? 
C8 C12 H12 115.5 . . ? 
C12 C13 C14 125.28(17) . . ? 
C12 C13 H13 117.4 . . ? 
C14 C13 H13 117.4 . . ? 
C15 C14 C19 117.02(19) . . ? 
C15 C14 C13 120.72(17) . . ? 
C19 C14 C13 122.3(2) . . ? 
O3 C15 C16 121.3(2) . . ? 
O3 C15 C14 117.22(18) . . ? 
C16 C15 C14 121.46(17) . . ? 
C15 C16 C17 120.5(2) . . ? 
C15 C16 H16 119.8 . . ? 
C17 C16 H16 119.8 . . ? 
C18 C17 C16 119.04(19) . . ? 
C18 C17 H17 120.5 . . ? 
C16 C17 H17 120.5 . . ? 
O4 C18 C19 114.6(2) . . ? 
O4 C18 C17 124.94(19) . . ? 
C19 C18 C17 120.46(17) . . ? 
C18 C19 C14 121.5(2) . . ? 
C18 C19 H19 119.2 . . ? 
C14 C19 H19 119.2 . . ? 
O4 C20 H20A 109.5 . . ? 
O4 C20 H20B 109.5 . . ? 
H20A C20 H20B 109.5 . . ? 
O4 C20 H20C 109.5 . . ? 
H20A C20 H20C 109.5 . . ? 
H20B C20 H20C 109.5 . . ? 
  
loop_ 
 _geom_torsion_atom_site_label_1 
 _geom_torsion_atom_site_label_2 
 _geom_torsion_atom_site_label_3 
 _geom_torsion_atom_site_label_4 
 _geom_torsion 
 _geom_torsion_site_symmetry_1 
 _geom_torsion_site_symmetry_2 
 _geom_torsion_site_symmetry_3 
 _geom_torsion_site_symmetry_4 
 _geom_torsion_publ_flag 
C6 C1 C2 C3 -1.1(3) . . . . ? 
C1 C2 C3 C4 1.3(4) . . . . ? 
C2 C3 C4 C5 -0.3(3) . . . . ? 
C3 C4 C5 C6 -1.0(3) . . . . ? 
C4 C5 C6 C1 1.3(3) . . . . ? 
C4 C5 C6 C7 178.43(19) . . . . ? 
C2 C1 C6 C5 -0.2(3) . . . . ? 
C2 C1 C6 C7 -177.2(2) . . . . ? 
C5 C6 C7 C8 145.4(2) . . . . ? 
C1 C6 C7 C8 -37.6(3) . . . . ? 
C6 C7 C8 C12 -4.5(4) . . . . ? 
C6 C7 C8 C9 -176.42(17) . . . . ? 
C10 O1 C9 O2 -4.5(3) . . . . ? 
C10 O1 C9 C8 174.02(15) . . . . ? 
C7 C8 C9 O2 154.3(2) . . . . ? 
C12 C8 C9 O2 -18.0(3) . . . . ? 
C7 C8 C9 O1 -24.2(3) . . . . ? 
C12 C8 C9 O1 163.51(16) . . . . ? 
C9 O1 C10 C11 179.90(15) . . . . ? 
C7 C8 C12 C13 165.5(2) . . . . ? 
C9 C8 C12 C13 -22.6(3) . . . . ? 
C8 C12 C13 C14 179.40(17) . . . . ? 
C12 C13 C14 C15 179.75(18) . . . . ? 
C12 C13 C14 C19 0.5(3) . . . . ? 
C19 C14 C15 O3 178.81(16) . . . . ? 
C13 C14 C15 O3 -0.4(3) . . . . ? 
C19 C14 C15 C16 -0.6(3) . . . . ? 
C13 C14 C15 C16 -179.89(18) . . . . ? 
O3 C15 C16 C17 -178.55(17) . . . . ? 
C14 C15 C16 C17 0.9(3) . . . . ? 
C15 C16 C17 C18 0.3(3) . . . . ? 
C20 O4 C18 C19 179.26(16) . . . . ? 
C20 O4 C18 C17 -0.8(3) . . . . ? 
C16 C17 C18 O4 178.45(17) . . . . ? 
C16 C17 C18 C19 -1.6(3) . . . . ? 
O4 C18 C19 C14 -178.18(16) . . . . ? 
C17 C18 C19 C14 1.9(3) . . . . ? 
C15 C14 C19 C18 -0.7(3) . . . . ? 
C13 C14 C19 C18 178.51(18) . . . . ? 
  
loop_ 
 _geom_hbond_atom_site_label_D 
 _geom_hbond_atom_site_label_H 
 _geom_hbond_atom_site_label_A 
 _geom_hbond_distance_DH 
 _geom_hbond_distance_HA 
 _geom_hbond_distance_DA 
 _geom_hbond_angle_DHA 
 _geom_hbond_site_symmetry_A 
O3 H3 O2  0.82 1.97 2.783(2) 171.9 2_546 
  
_diffrn_measured_fraction_theta_max    0.999 
_diffrn_reflns_theta_full              25.02 
_diffrn_measured_fraction_theta_full   0.999 
_refine_diff_density_max    0.191 
_refine_diff_density_min   -0.253 
_refine_diff_density_rms    0.051 
